# Supplementary material for: Diacerein Inhibits Myopia Progression through Lowering Inflammation in Retinal Pigment Epithelial Cell
Source: Mediators Inflamm. 2021 Jul 3;2021:6660640. doi: 10.1155/2021/6660640 (PMC8275387; doi:10.1155/2021/6660640)
Supplement: Supplementary Materials — Supplementary Figure 1: increased expression of TNF-α in the retina of hamsters after MFD-induced myopia progression. Supplementary Figure 2: original blots of Figure 6. Supplementary Figure 3: immunohistochemical analysis of TGF-β1, MMP-2, type I collagen, IL-6, IL-8, and MCP-1 expression in right eye control of a normal hamster. Supplementary Figure 4: immunohistochemical and analysis of TGF-β1, MMP-2, type I collagen, IL-6, IL-8, and MCP-1 expression in left eye control, 1% atropine, and 10 mM diacerein of a hamster. [file 6660640.f1.docx]

**Diacerein inhibits myopia progression through lowering inflammation in retinal pigment epithelial cell**

Peng-Tai Tiena,b,&, Chia-Hung Linc,&, Chih-Sheng Chenc,d, Ching-Yao Change, Hsiangyu Kuf, Dekang Ganf, Yi-Yu Tsaia,b,Jamie Jinn-Yi Chenb, Hui-Ju Linb,c, Lei Wanc,e,g

aGraduate Institute of Clinical Medical Science, College of Medicine, China Medical University, Taichung, Taiwan

bDepartment of Ophthalmology, China Medical University Hospital, Taichung, Taiwan

cSchool of Chinese Medicine, College of Chinese Medicine, China Medical University, Taichung, Taiwan

dDivision of Chinese Medicine, Asia University Hospital, Taichung, Taiwan

eDepartment of Biotechnology, Asia University, Taichung, Taiwan

f Department of Ophthalmology and Visual Science, Eye and ENT Hospital, Shanghai Medical College, Fudan University, Shanghai 200031, People’s Republic of China

gDepartment of Obstetrics and Gynecology, China Medical University Hospital, Taichung, Taiwan

**Supplementary Figure 1:**

**
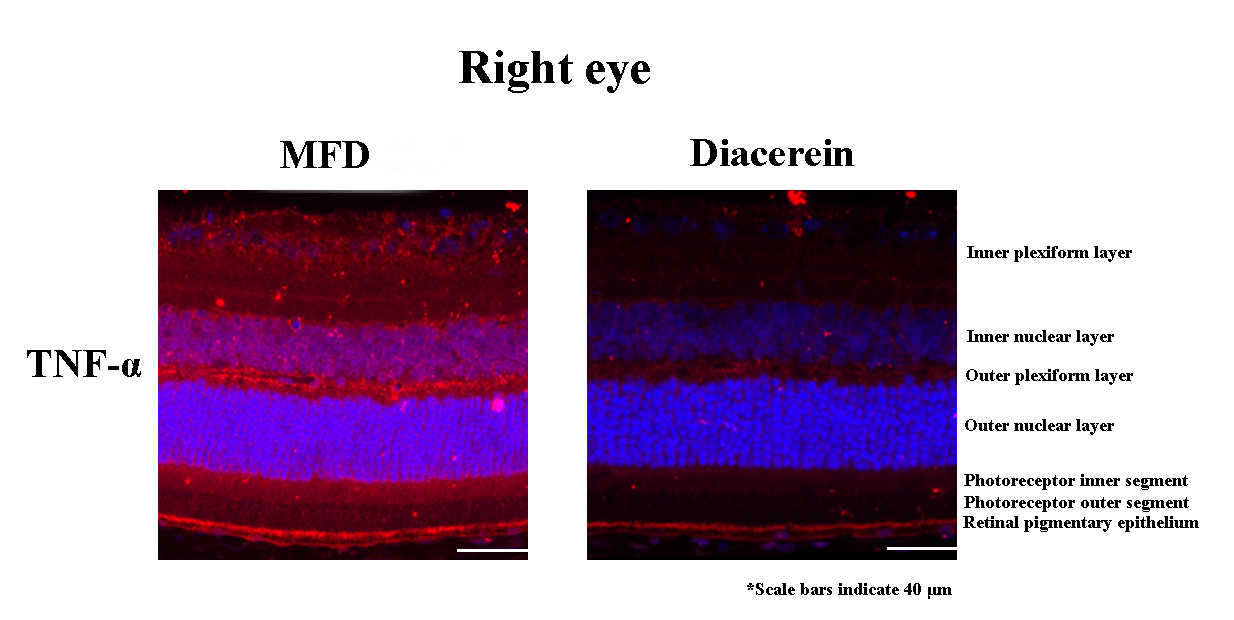
**

**Supplementary Figure 1: Increased expression of TNF-α in retina of hamsters after MFD induced myopia progression**

Immunofluorescence analysis of TNF-α expression in MFD eyes (Right eye MFD), and 10 mM diacerein-treated MFD eyes (Right eye diacerein).

**Supplementary Figure 2: Original Blots of Figure 6**

**
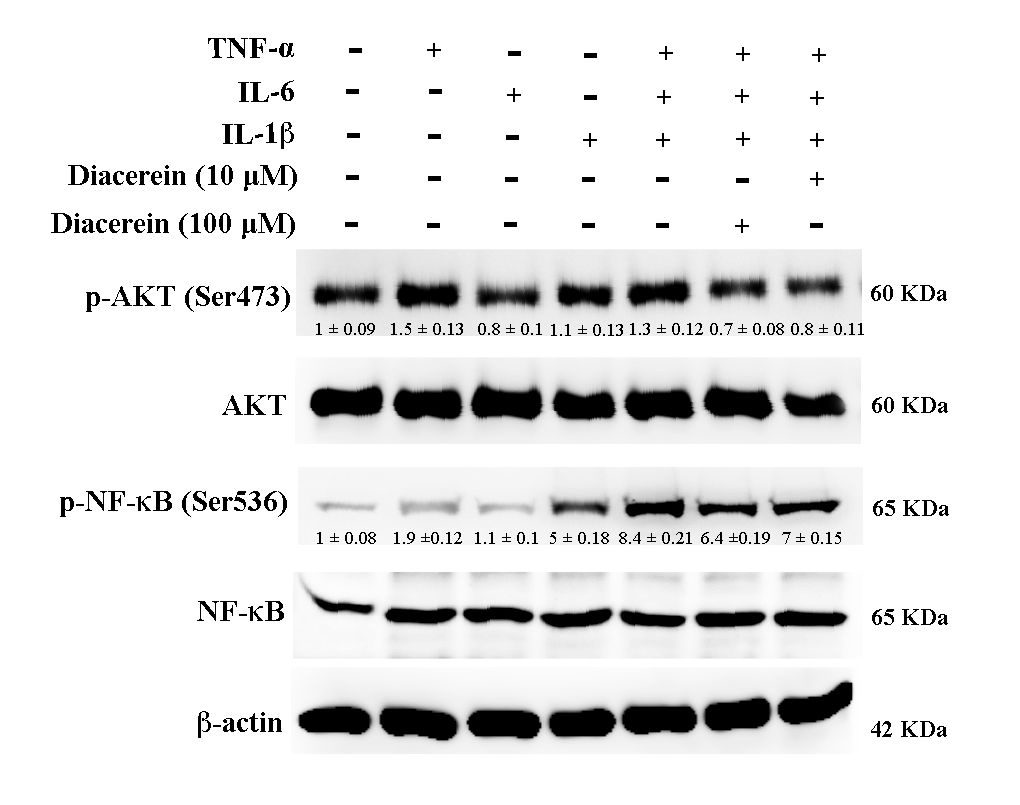
**

**Uncropped western blot images**

p-AKT (Ser473)


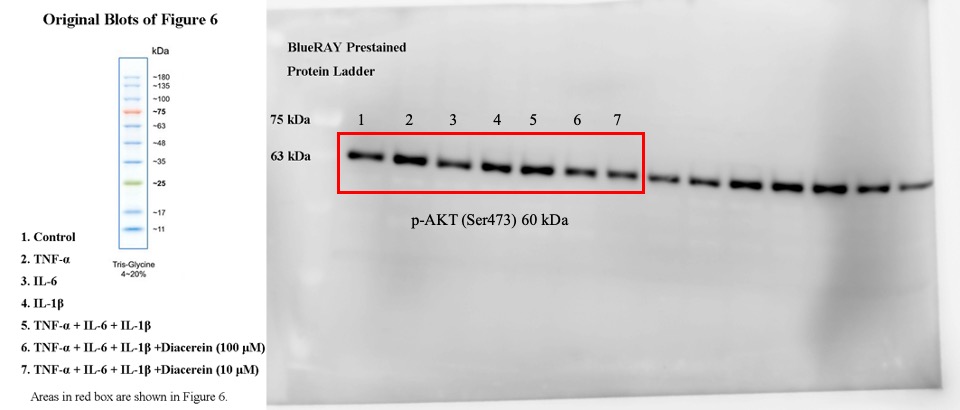


AKT


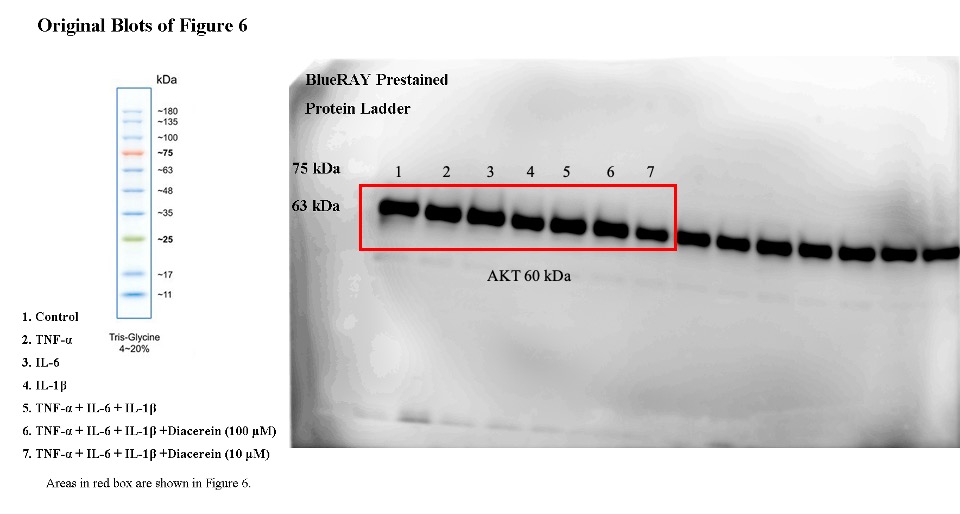


p-NFκB


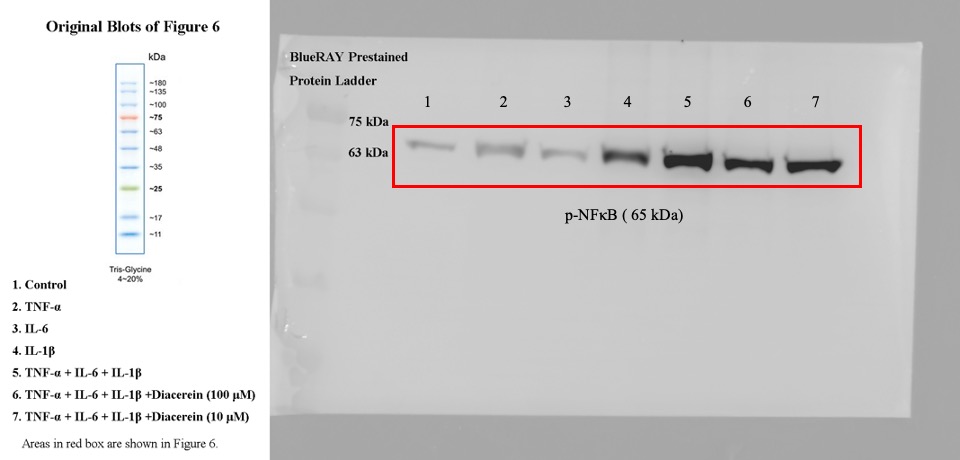


NFκB


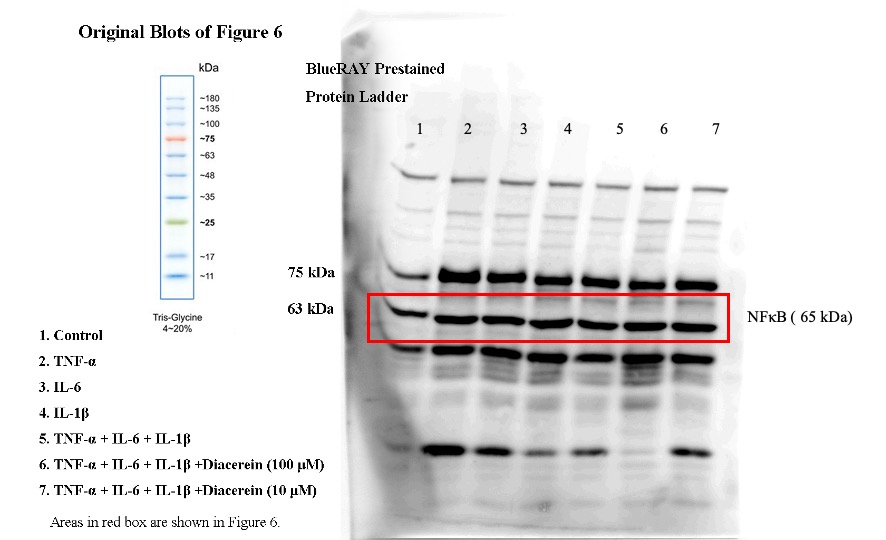


β-actin


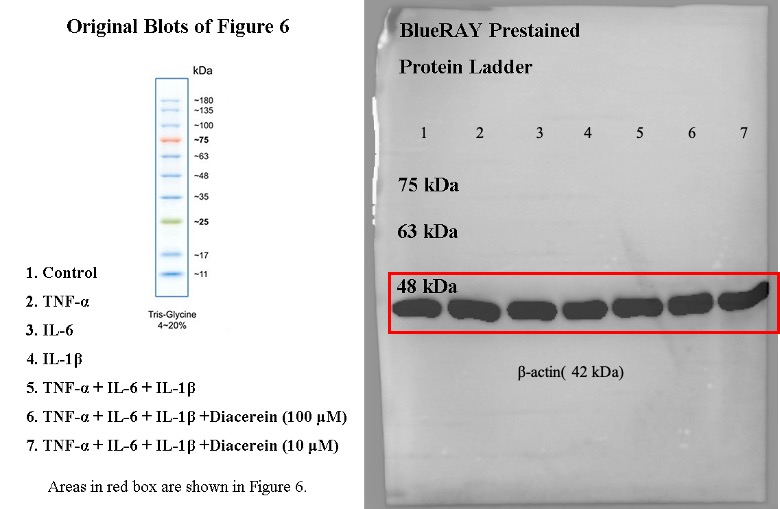


**Supplementary Figure 3:**


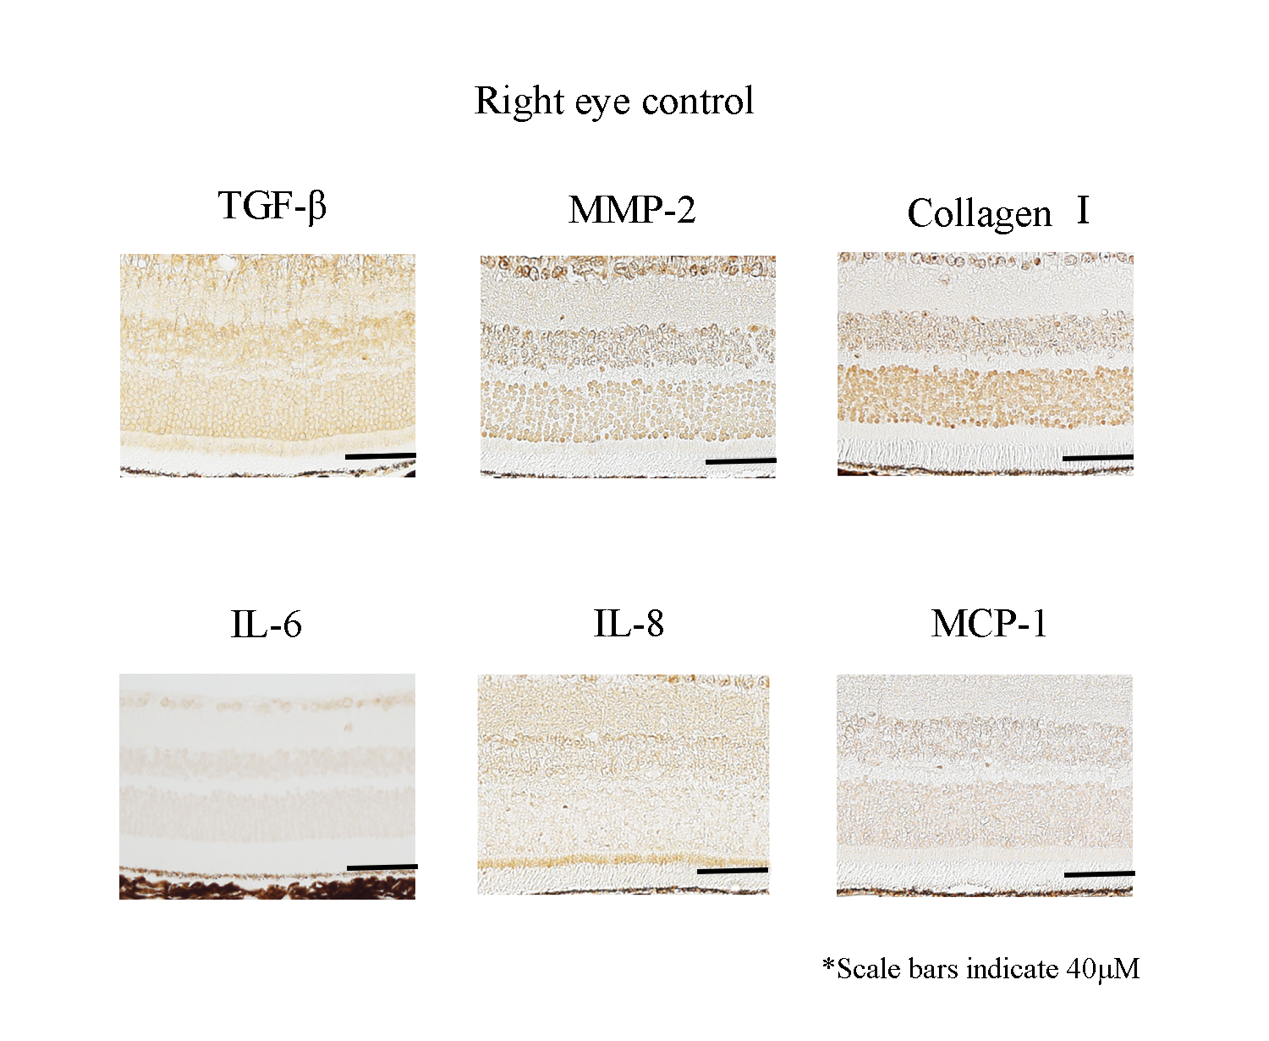


**Supplementary Figure 3: Immunohistochemical analysis of TGF-β1, MMP-2, type Ⅰ collagen, IL-6, IL-8, and MCP-1 expression in Right eye control of a normal hamster.**

**Supplementary Figure 4:**


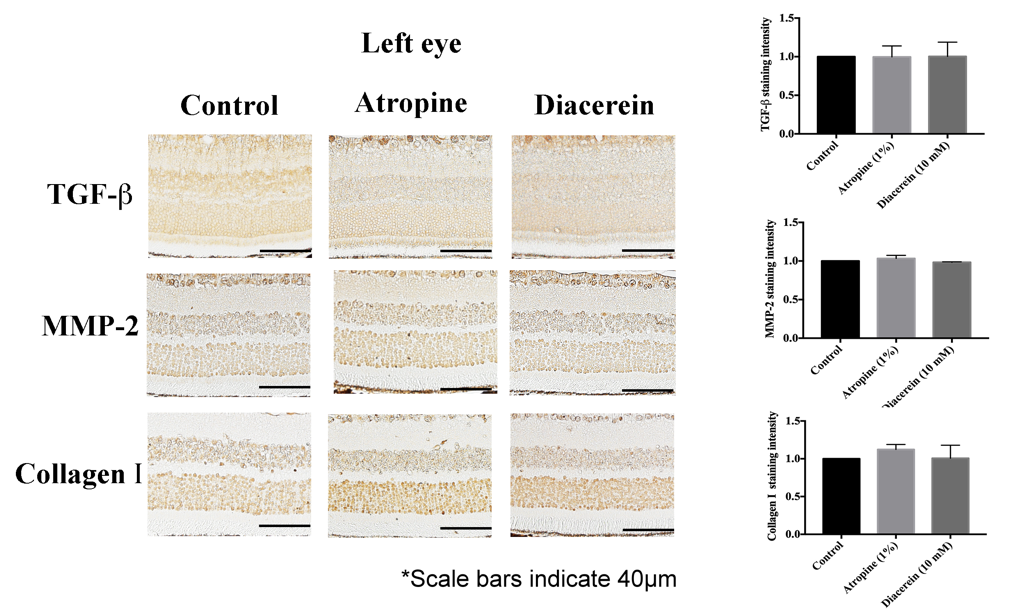


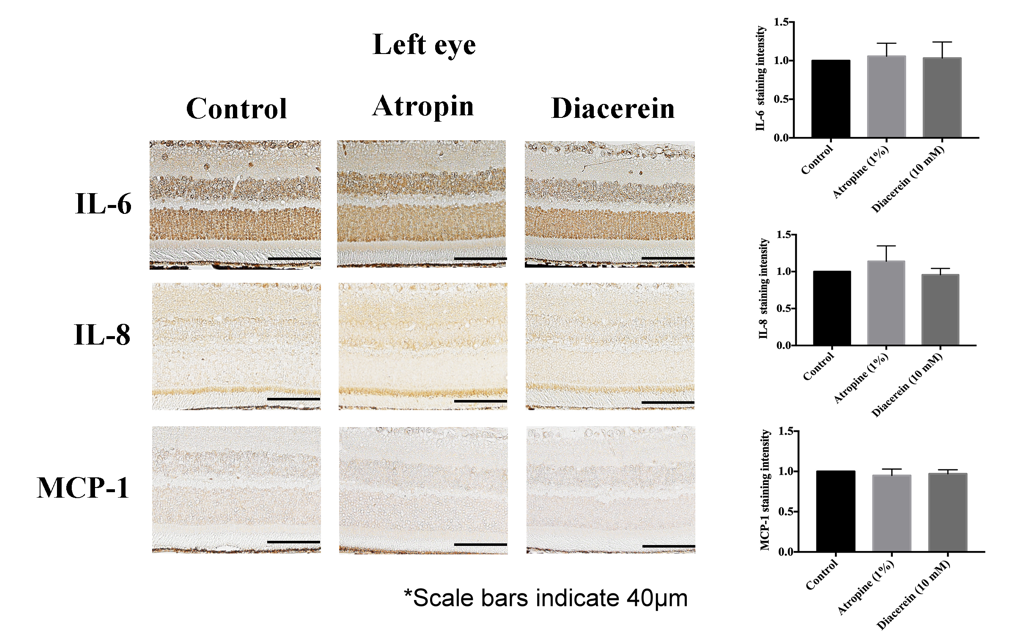


**Supplementary Figure 4: Immunohistochemical and analysis of TGF-β1, MMP-2, type Ⅰ collagen, IL-6, IL-8, and MCP-1 expression in Left eye control, 1% atropine, and 10 mM diacerein of hamster.**
